# Supplementary material for: Enhancing the Stability and Bioaccessibility of Tree Peony Seed Oil Using Layer-by-Layer Self-Assembling Bilayer Emulsions
Source: MDPI journal article supplement (doi:10.3390/antiox12051128), 2023-05-20

# **Enhancing the stability and bioaccessibility of tree peony seed oil using layer-by-layer self-assembling bilayer emulsions**

Wen-Sen He,<sup>a,\*</sup> Qingzhi Wang,<sup>a</sup> Zhishuo Li,<sup>a</sup> Jie Li,<sup>a</sup> Liying Zhao,<sup>a</sup> Junjie Li,<sup>a</sup> Chen Tan,<sup>b</sup>

Fayong Gong<sup>c</sup>

<sup>a</sup> *School of Food and Biological Engineering, Jiangsu University, 301 Xuefu Road, Zhenjiang  
212013, Jiangsu, China*

<sup>b</sup> *Beijing Engineering and Technology Research Center of Food Additives, Beijing Technology  
& Business University (BTBU), Beijing 100048, China*

<sup>c</sup> *Panxi Crops Research and Utilization Key Laboratory of Sichuan Province, Xichang  
University, Xichang 615013, China*

\*Corresponding Author.

E-mail: wshe2013@163.com (HE W. S.)

Table S1 Composition of major fatty acids and beneficial components in tree peony seed oil.

| Compositions          |                              | Content      |
|-----------------------|------------------------------|--------------|
| Fatty acid<br>(mg/g)  | C16:0                        | 42.87±3.32   |
|                       | C18:0                        | 8.39±0.67    |
|                       | C18:1                        | 169.97±12.36 |
|                       | C18:2                        | 192.59±14.57 |
|                       | C18:3                        | 301.15±22.22 |
| Beneficial components | Total phenols (mg GAE/kg)    | 17.22±0.47   |
|                       | Total flavonoids (mg RAE/kg) | 22.33±1.85   |
|                       | γ-Tocopherol (mg/100g)       | 13.87±1.33   |
|                       | Squalene (mg/100g)           | 2.58±0.30    |
|                       | β-Sitosterol (mg/100g)       | 182.94±12.90 |

Figure S1 Physical properties, microscopic images, and appearance of monolayer emulsion

prepared with different concentrations of WPI. (A) Zeta potential (mV). (B) Particle size (nm).

(C) PDI (%). (D) Encapsulation efficiency (%). (E)-(I) The appearance and microscopic image of

emulsion in 0.5-2.5% of WPI. One-way ANOVA followed by LSD test was used for statistical

significance. Data are expressed as the means with different superscript letters (a, b, c) differ

significantly at  $p < 0.05$ .

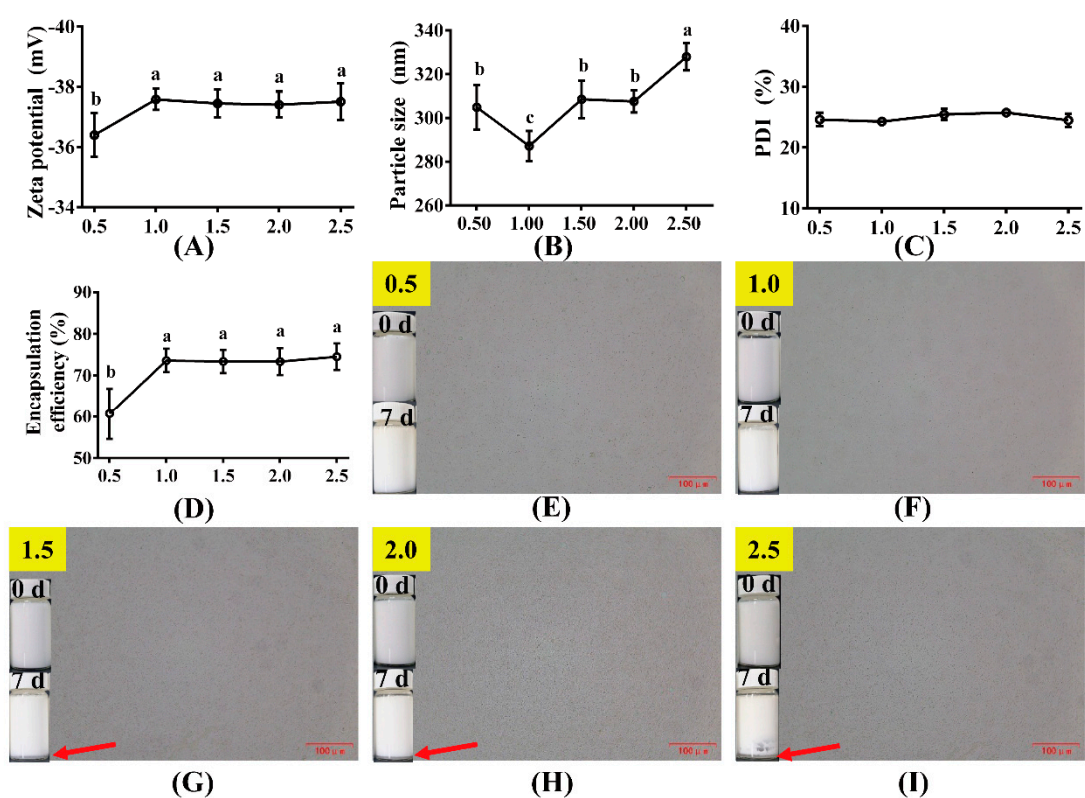

Figure S2 Physical properties, microscopic images and appearance of TPSO bilayer emulsions produced using different concentrations of SA. (A) Zeta potential (mV). (B) Particle size (nm). (C) PDI (%). (D) Encapsulation efficiency (%). (E)-(J) The microscopic images of emulsion in 0.25-1.5% of SA group. (K) and (L) The appearance of emulsion in 0.25-1.5% of SA group after 0 and 7 days. One-way ANOVA followed by LSD test was used for statistical significance. Data are expressed as the means with different superscript letters (a, b, c) differ significantly at  $p < 0.05$ .

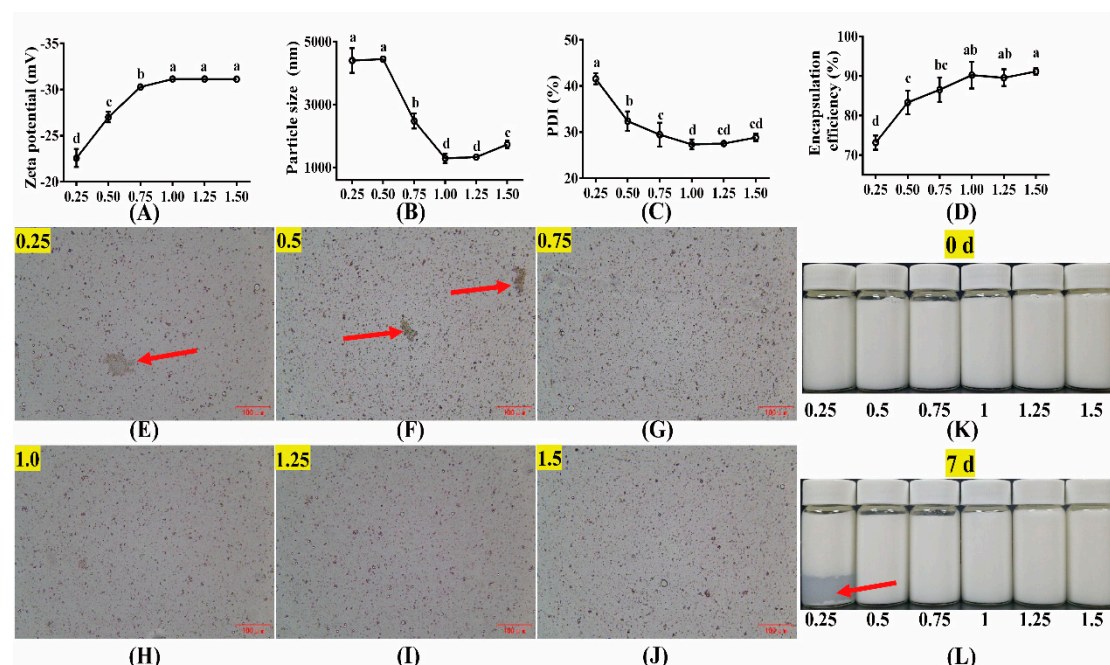

Supplement: s1 [file s1]
